# Supplementary material for: Carbon isotopes and Pa / Th response to forced circulation changes: a model perspective
Source: Copernicus journal article supplement (doi:10.5194/cp-2019-45), 2019-04-23
Supplement: Supplementary file 1 [file cp-2019-45-supplement.zip]

Archive with 2 entries (2 files):
- SOM-multiproxy_response/model_multi_proxy_response_SOM_v15_formatted.pdf
- SOM-multiproxy_response/SOM_TableS1-S2.xlsx
