# Supplementary material for: Carbon isotopes and Pa / Th response to forced circulation changes: a model perspective
Source: Copernicus journal article supplement (doi:10.5194/cp-2019-45), 2019-04-23
Supplement: Supplementary file 1 [file cp-2019-45-supplement.zip › SOM-multiproxy_response/model_multi_proxy_response_SOM_v15_formatted.pdf]

## Carbon isotopes and Pa/Th response to forced circulation changes: a model perspective

L. Missiaen<sup>1,2</sup>, N. Bouttes<sup>1</sup>, D.M. Roche<sup>1,3</sup>, J-C. Dutay<sup>1</sup>, A. Quiquet<sup>1,4</sup>, C. Waelbroeck<sup>1</sup>, S. Pichat<sup>5,6</sup>, J-Y Peterschmidt<sup>1</sup>

<sup>1</sup>Laboratoire des Sciences du Climat et de l'Environnement, LSCE/IPSL, CEA-CNRS-UVSQ-Université Paris-Saclay, F-91198 Gif-sur-Yvette, France.

<sup>2</sup>Climate Change Research Centre, University of New South Wales, Sydney, Australia

<sup>3</sup>Vrije Universiteit Amsterdam, Faculty of Science, Cluster Earth and Climate, de Boelelaan 1085, 1081HV Amsterdam, The Netherlands

<sup>4</sup>Institut Louis Bachelier, Chair Energy and Prosperity, Paris, 75002, France

<sup>5</sup>Université de Lyon, ENS de Lyon, Laboratoire de Géologie de Lyon (LGL-TPE), F-69007 Lyon, France.

<sup>6</sup>Climate Geochemistry Department, Max Planck Institute for Chemistry, Mainz, Germany.

*Correspondence to:* Lise Missiaen (l.missiaen@unsw.edu.au)

The supplementary material includes:

- **Supplementary text**

**Text S1:** Model Tuning

**Text S2:** Dissolved and particulate <sup>231</sup>Pa and <sup>230</sup>Th

- **Supplementary figures**

**Fig. S1.** Atlantic sections for <sup>231</sup>Pa and <sup>230</sup>Th dissolved and particulate concentrations

**Fig. S2.** Model-data agreement for <sup>231</sup>Pa and <sup>230</sup>Th dissolved and particulate water column concentrations

**Fig. S3.** Atlantic meridional stream function (Sv)

**Fig. S4.** Proxy anomalies in the eastern Atlantic basin

**Fig. S5.** Proxy response times in the eastern Atlantic basin

- **Supplementary tables (in a separate *xlsx* file)**

**Tab. S1.** Compilation of Kd and fractionations factors from observations and model studies

**Tab. S2.** Latin Hypercube Sampling inputs and best fit parameters

## Text S1: Model Tuning

In an attempt to be closer to reality, we chose to represent the non-equilibrium relation between dissolved and particulate Pa and Th. Therefore, for both isotopes, we considered adsorption and desorption coefficients ( $K_{\text{adsorp}}$  and  $K_{\text{desorp}}$ ) and transported both dissolved and particulate activities instead of transporting a total activity that is split into particulate and dissolved activities using partition coefficients ( $K_d$ -describing equilibrium situation). If some observations are available to constrain the  $K_d$  coefficients (e.g. (Chase *et al.*, 2002; Hayes *et al.*, 2015)), a wide range of  $K_d$  values have been observed in the modern ocean and to date, no consensus value is available. Concerning adsorption and desorption coefficients, even less constraints are available. Equation 4 only allows to determine a range for  $K_{\text{adsorp}}/K_{\text{desorp}}$  ratio from the available ranges of  $K_d$  coefficients. As a first approach, we chose here to consider a single and constant  $K_{\text{desorp}}$  value but there is no theoretical reason to prevent  $K_{\text{desorp}}$  to be different for POC,  $\text{CaCO}_3$  or opal particles. Thus, there are six  $\sigma_{i,j}$  and potentially six  $K_{\text{desorp}}$  coefficients to adjust with the available observational data (that are ranges for the six  $K_d$  and three  $F(\text{Th}/\text{Pa})$  values).

In this study we chose to tune the three Th  $\sigma$  coefficients and the three  $F(\text{Th}/\text{Pa})$  fractionation factors. We used a LHS methodology to produce 60 sets of final  $\sigma_{i,j}$  coefficients to be tested. Because there are wide ranges of possible Th  $\sigma$  coefficients and  $F(\text{Th}/\text{Pa})$ , it is possible that the LHS probably did not capture the right balance between the scavenging efficiency of the different particle types. Indeed, in the majority of the tested parameters sets, the  $K_{d-\text{Pa,opal}}$  was greater than  $K_{d-\text{Pa-CaCO}_3}$  or  $K_{d-\text{Pa-POC}}$ . In other words, in most of our tuning tests, opal was the main scavenger for Pa. This could explain why in our model we obtain low dissolved Pa concentrations in the opal belt area compared to the observations (Figure S1). Indeed, as for Pa the highest  $K_d$  is attributed to opal, Pa is mainly retrieved from the water column and exported towards the sediments via the opal sedimentary flux throughout the global ocean. Thus, in that configuration, tests to reduce the  $\sigma_{\text{Pa,opal}}$  lead to a general increase of the dissolved Pa in the water column. This deterioration of the general model-data agreement is likely a consequence of reduced Pa scavenging in the high latitude and advection of the signal elsewhere.

Additionally, the model-data agreement evaluation was problematic: when calculating the Root Mean Squared Error (RMSE) for the four tracers (4 metrics corresponding to: dissolved Pa, dissolved Th, particulate Pa and particulate Th) we observed that the best simulations for Pa did not correspond to the best simulations for Th and vice versa. When trying

to combine the best  $\sigma_{i,j}$  parameters for Pa and their counterparts for Th from 2 distinct simulations, we observed that the  $F(\text{Th/Pa})$  were out of the observation range. To choose the best fit simulation we established a classification of the 60 tuning simulations based on the RMSE between model output and the observation for each of our five metrics (particulate Pa, particulate Th, dissolved Pa and dissolved Th and sedimentary Pa/Th). The best fit simulation was selected among the candidates that appeared in the 30 first ranks for each metric after visual evaluation of the model-data agreement (using tools such as Figures 1 S1 and S2).

One way to overcome the tuning issues highlighted above could be to select the six  $\sigma_{i,j}$  coefficients as input parameters of the LHS, generate a significantly higher number of parameter sets and discard a posteriori the parameters set which do not fulfill the observational  $F(\text{Th/Pa})$  constraints. This would also allow to ensure testing configurations in which opal is not the main scavenger for Pa.

## **Text S2: Dissolved and particulate $^{231}\text{Pa}$ and $^{230}\text{Th}$**

Figure S1 shows the climatological annual mean simulated dissolved and particulate  $^{231}\text{Pa}$  and  $^{230}\text{Th}$  activities in the water column for the last 100 years of the equilibrium best fit-simulation. Model results are presented as basin-wide zonal averages and the observations are superimposed as circles. Overall, we succeed in producing a realistic range for both dissolved and particulate  $^{231}\text{Pa}$  and  $^{230}\text{Th}$  concentrations. These concentrations generally increase with depth, which is expected in the reversible scavenging theoretical model and consistent with observations.

However, our model generally simulates lower particulate and dissolved concentrations than what is measured in the present-day ocean (Figure S1), in particular at the surface. We also observe a better model performance for Th concentrations than for dissolved or particulate Pa (Figure S1 and S2). Model to data agreement is generally better at depths  $> 2,500$  m than closer to the surface (Figure S2), which, together with the too low dissolved concentrations, indicate that our scheme tends to scavenge too fast. In other words, Pa and Th quickly adsorb on the settling particles and are too rapidly removed from the water column. This is consistent with the better Th results which is more rapidly scavenged than Pa in the modern ocean due to higher particulate reactivity. The fast scavenging regime of our model is also consistent with the  $K_d$  coefficients obtained for our PI best-fit iLOVECLIM simulation that are in the upper range of the observations (Table 2- Table S1) and are significantly higher than the ones reported in (van Hulten et al., 2018). As evidenced by (Dutay et al., 2009), the scavenging intensity and efficiency strongly depends on the particles concentration and settling speed (Eq 4). In this

study we applied the particles concentrations from PISCES but used different settling speed. Indeed, we considered only one particle size with a settling speed of 1,000 m/y, which is close to the settling speed of the small particles considered in (van Hulst et al., 2018) (2m/d ~730 m/y) but much lower than that considered for big particles (50 m/d ~18250 m/y). Using the  $^{231}\text{Pa}$  and  $^{230}\text{Th}$  content of suspended particles and water samples, (Gdaniec et al., 2018) evaluated the particle settling speed between 500 and 1,000 m/y which is close to the value used in our model simulations. Including the settling speed into the tuning coefficients could be part of further developments to increase model-data agreement under PI conditions.

Finally, our model set-up does not currently account for Pa and Th scavenging by lithogenic particles. Reanalysis of observational data (e.g.(Luo and Ku, 2004)) evidenced the important role of the lithogenic particles in the Pa and Th scavenging. In some model studies, lithogenic particles have been found unimportant (e.g. (Siddall et al., 2005)), whereas in other model studies lithogenic particles carry most of the particle bound Pa and Th (e.g. (van Hulst et al., 2018)). The importance of the lithogenic particles is thus model dependent and probably strongly relies on the adsorption coefficient tuning, the problem being largely underconstrained. A better model-data agreement could also be achieved by including lithogenic particles in the model.

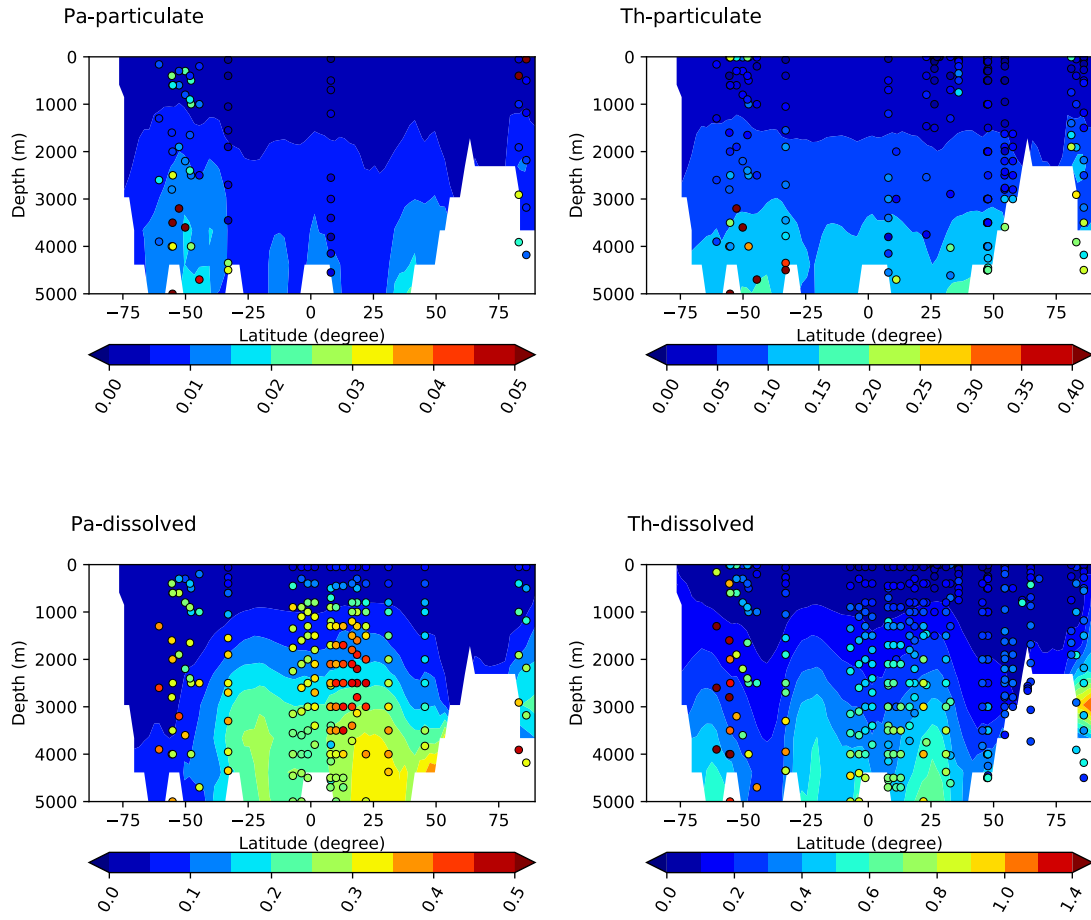

**Figure S1:** Atlantic sections showing water column showing dissolved and particle-bound  $^{231}\text{Pa}$  (left panel) and  $^{230}\text{Th}$  activities in  $\text{dpm.g}^{-1}$  (right panel) simulated by iLOVECLIM (color background) and observation data (colored dots) compiled in (Dutay et al., 2009).

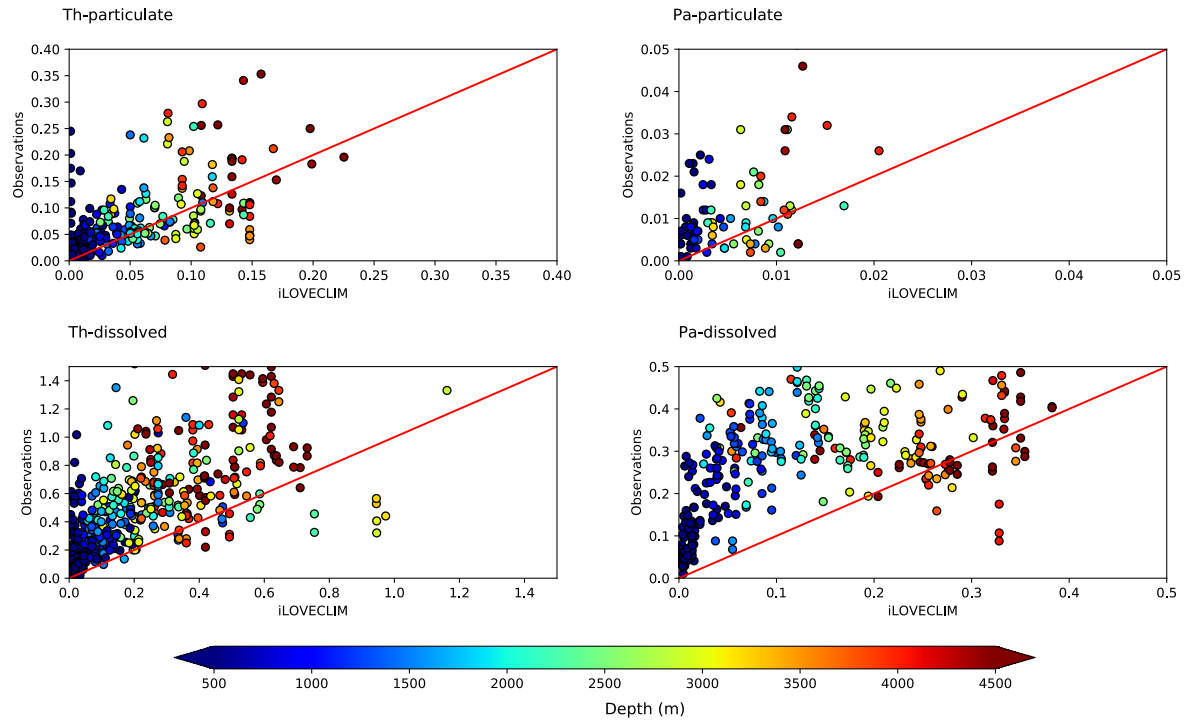

**Figure S2: Model-data agreement for  $^{231}\text{Pa}$  and  $^{230}\text{Th}$  dissolved and particulate water column concentrations.**

In each panel, dots represent the observed concentrations (y-axis) against the modeled concentration in the closest grid-cell (x-axis). The color of the dot represents the corresponding water depth. The red line (1:1) represents the ideal model-data agreement.

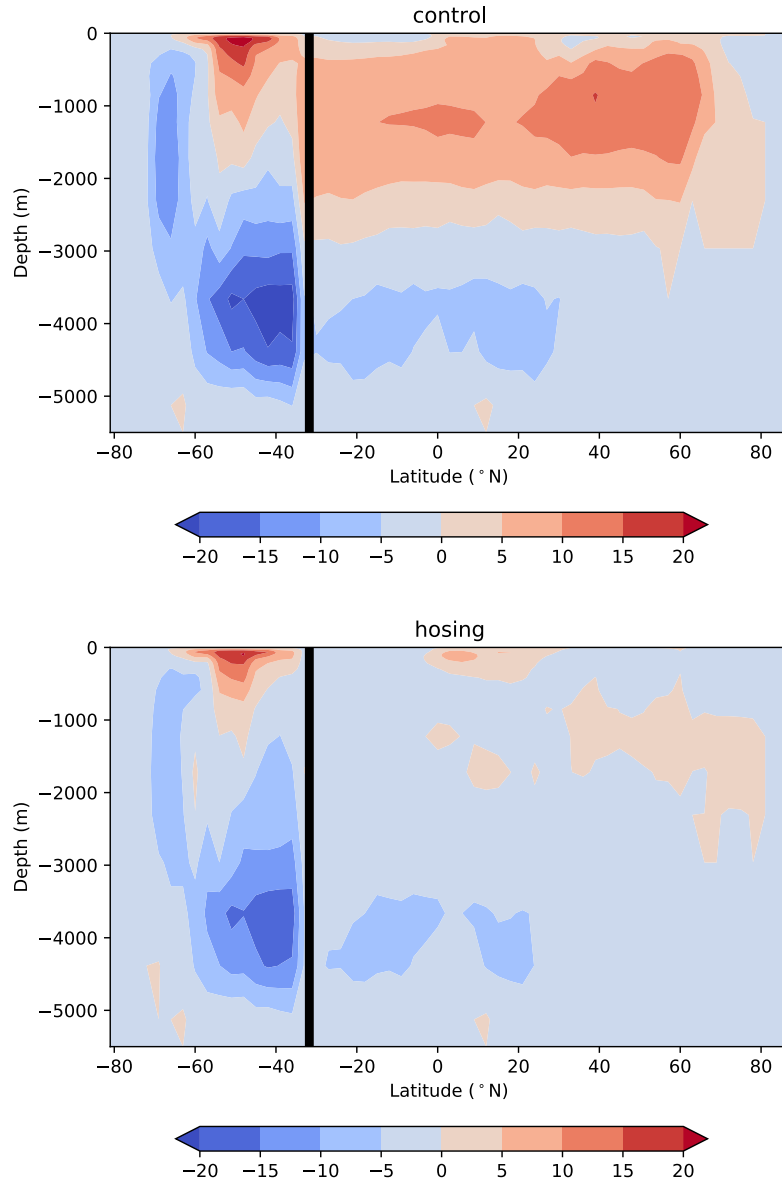

**Figure S3: Atlantic meridional stream function (Sv)**

The upper panel shows the average stream function during the control period of simulation (i.e. the first 300 years under PI conditions). The lower panel presents the average stream function during the last 100 years of freshwater forcing (year 500 to y 600). The vertical black line indicates the limit between the Southern Ocean south of 32°S and the Atlantic Ocean north of 32° S.

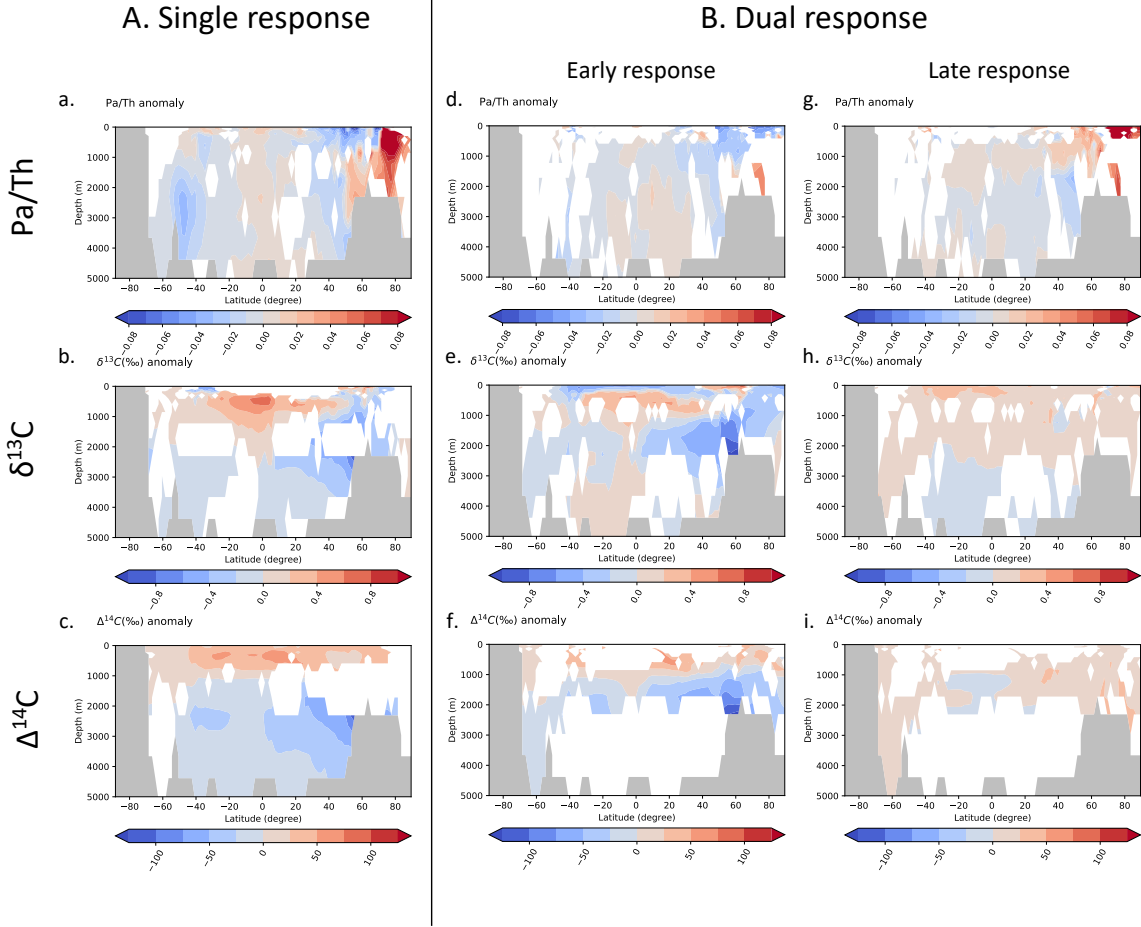

**Figure S4: Zonally averaged anomalies for Pa/Th,  $\delta^{13}\text{C}$  and  $\Delta^{14}\text{C}$  in the eastern basin in the case of a freshwater input in the Nordic seas.**

The represented anomalies correspond to the proxy value corresponding to the proxy response – the mean of the proxy value during the control period of 300 years under PI conditions (see Figure 2 for proxy response definition).

As on Figure 3, **A.** (a. to c.) Represents the anomalies for the three proxies in the case where exactly one proxy response has been detected. In the case of two proxy responses, **(B.)** d.to f. represent the proxy anomaly value for the early (first) response, while g.to i. represent the proxy anomaly for the late (second) proxy response. Areas left in blank were not showing a unique response (A.) or not showing exactly two responses (B.) In each subplot, the grey contours represent the ocean bottom.

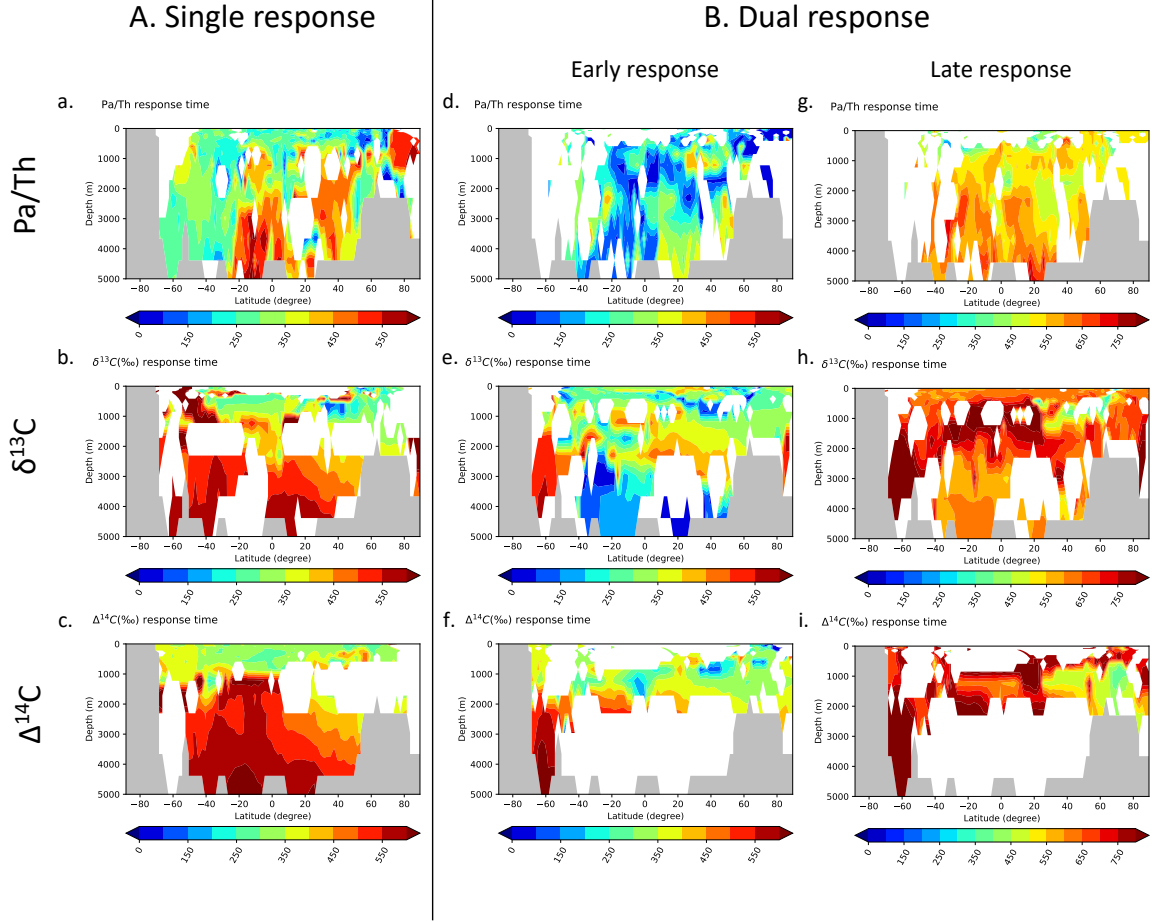

**Figure S5: Zonally averaged response times for Pa/Th,  $\delta^{13}\text{C}$  and  $\Delta^{14}\text{C}$  in the eastern basin in the case of a freshwater input in the Nordic seas.**

As on Figure 4, **A.** Response time in the case where exactly one single proxy response is detected. In the case where two distinct responses are detected (**B.**) d. to f. show the response time of the early (first) response and g. to i. show the response time corresponding to the late (second) response. Areas left in blank were not showing a unique response (A.) or not showing exactly two responses (B.) In each subplot, the grey contours represent the ocean bottom.

## References

- Chase, Z., Anderson, R. F., Fleisher, M. Q. and Kubik, P. W.: The influence of particle composition and particle flux on scavenging of Th, Pa and Be in the ocean, *Earth and Planetary Science Letters*, 204(1), 215–229, doi:10.1016/S0012-821X(02)00984-6, 2002.
- Dutay, J.-C., Lacan, F., Roy-Barman, M. and Bopp, L.: Influence of particle size and type on  $^{231}\text{Pa}$  and  $^{230}\text{Th}$  simulation with a global coupled biogeochemical-ocean general circulation model: A first approach, *Geochemistry, Geophysics, Geosystems*, 10(1), 2009.
- Gdaniec, S., Roy-Barman, M., Foliot, L., Thil, F., Dapoigny, A., Burckel, P., Garcia-Orellana, J., Masqué, P., Mörrh, C.-M. and Andersson, P. S.: Thorium and protactinium isotopes as tracers of marine particle fluxes and deep water circulation in the Mediterranean Sea, *Marine Chemistry*, 199, 12–23, doi:10.1016/j.marchem.2017.12.002, 2018.
- Hayes, C. T., Anderson, R. F., Fleisher, M. Q., Vivancos, S. M., Lam, P. J., Ohnemus, D. C., Huang, K.-F., Robinson, L. F., Lu, Y., Cheng, H., Edwards, R. L. and Moran, S. B.: Intensity of Th and Pa scavenging partitioned by particle chemistry in the North Atlantic Ocean, *Marine Chemistry*, 170, 49–60, doi:10.1016/j.marchem.2015.01.006, 2015.
- van Hulst, M., Dutay, J.-C. and Roy-Barman, M.: A global scavenging and circulation ocean model of thorium-230 and protactinium-231 with improved particle dynamics (NEMO-ProThorP 0.1), *Geosci. Model Dev.*, 11(9), 3537–3556, doi:10.5194/gmd-11-3537-2018, 2018.
- Luo, S. and Ku, T.-L.: On the importance of opal, carbonate, and lithogenic clays in scavenging and fractionating  $^{230}\text{Th}$ ,  $^{231}\text{Pa}$  and  $^{10}\text{Be}$  in the ocean, *Earth and Planetary Science Letters*, 220(1), 201–211, doi:10.1016/S0012-821X(04)00027-5, 2004.
- Siddall, M., Henderson, G. M., Edwards, N. R., Frank, M., Müller, S. A., Stocker, T. F. and Joos, F.:  $^{231}\text{Pa}/^{230}\text{Th}$  fractionation by ocean transport, biogenic particle flux and particle type, *Earth and Planetary Science Letters*, 237(1), 135–155, doi:10.1016/j.epsl.2005.05.031, 2005.
