# Supplementary material for: Carbon isotopes and Pa / Th response to forced circulation changes: a model perspective
Source: Copernicus journal article supplement (doi:10.5194/cp-2019-45), 2019-04-23
Supplement: Supplementary file 1 [file cp-2019-45-supplement.zip › SOM-multiproxy_response/SOM_TableS1-S2.xlsx]

## Sheet: Table S1
		Pa			Th			F(Th/Pa)
		KdPOC	Kdopal	KdCaCO3	KdPOC	Kdopal	KdCaCO3	CaCO3	POC	Opal
obs	Chase, 2002	-	1400000	220000	-	390000	9000000	40.91		0.28
	Hayes, 2015 (mean value)	600000	-	900000	3000000	-	30000000	33.33	5
	Hayes, 2015 (min value)	400000	-	500000	1000000	-	26000000	52	2.5
	Hayes, 2015(max value)	800000	-	1300000	5000000	-	34000000	26.15	6.25
Models	Sidall, 2005 (min value)	204000	204000	204000	204000	204000	204000	1	1	1
	Sidall, 2005 (mean value)	10000000	1670000	250000	10000000	500000	10000000	40	1	0.3
	Van_Hulten 2018	2000000	500000	120000	5000000	500000	5000000	41.67	2.5	1
	Van_Hulten 2018	400000	-	-	1000000	-	-		2.5

## Sheet: Table S2
	F(Th/Pa)CaCO3	F(Th/Pa)POC	F(Th/Pa)opal	σTh-CaCO3	σTh-POC	σTh-opal
min	2.3	0.6	0.2	4.56	0.08	0.06
max	48.1	10	2.8	200	6	16
best fit	41.15	3.54	0.49	76.83	5.47	3.77
